# Supplementary material for: High variability of export fluxes along the North Atlantic GEOTRACES section GA01: Particulate organic carbon export deduced from the 234 Th method
Source: Copernicus journal article supplement (doi:10.5194/bg-2018-190), 2018-04-26
Supplement: Supplementary file 1 [file bg-2018-190-supplement.pdf]

**Table S1:**  $^{238}\text{U}$  and total  $^{234}\text{Th}$  activities in  $\text{dpm L}^{-1}$  and resulting  $^{234}\text{Th}/^{238}\text{U}$  ratios.  $^{238}\text{U}$  activity is derived from salinity (see text).

| Station #                              | Depth m | Temperature °C | Salinity psu | $^{238}\text{U}$ $\text{dpm.L}^{-1}$ | $^{234}\text{Th}$ $\text{dpm.L}^{-1}$ | $^{234}\text{Th}/^{238}\text{U}$ |
|----------------------------------------|---------|----------------|--------------|--------------------------------------|---------------------------------------|----------------------------------|
| #1<br>40.3°N / -10.0 °E<br>20/05/2014  | 19      | 15.89          | 35.27        | 2.46 ± 0.05                          | 1.83 ± 0.06                           | 0.74                             |
|                                        | 39      | 14.93          | 35.55        | 2.48 ± 0.05                          | 1.69 ± 0.05                           | 0.68                             |
|                                        | 60      | 13.81          | 35.68        | 2.49 ± 0.05                          | 2.11 ± 0.07                           | 0.85                             |
|                                        | 79      | 13.44          | 35.71        | 2.49 ± 0.05                          | 2.39 ± 0.07                           | 0.96                             |
|                                        | 98      | 13.21          | 35.74        | 2.49 ± 0.05                          | 2.55 ± 0.08                           | 1.02                             |
|                                        | 119     | 13.02          | 35.73        | 2.49 ± 0.05                          | 2.50 ± 0.08                           | 1.00                             |
|                                        | 137     | 12.88          | 35.73        | 2.49 ± 0.05                          | 2.34 ± 0.07                           | 0.94                             |
|                                        | 158     | 12.73          | 35.71        | 2.49 ± 0.05                          | 2.44 ± 0.08                           | 0.98                             |
|                                        | 199     | 12.55          | 35.71        | 2.49 ± 0.05                          | 2.54 ± 0.08                           | 1.02                             |
|                                        | 246     | 12.29          | 35.69        | 2.49 ± 0.05                          | 2.60 ± 0.08                           | 1.05                             |
|                                        | 298     | 12.08          | 35.68        | 2.49 ± 0.05                          | 2.67 ± 0.08                           | 1.07                             |
|                                        | 396     | 11.69          | 35.65        | 2.49 ± 0.05                          | 2.59 ± 0.08                           | 1.04                             |
|                                        | 496     | 11.43          | 35.67        | 2.49 ± 0.05                          | 2.43 ± 0.07                           | 0.98                             |
|                                        | 589     | 11.41          | 35.77        | 2.50 ± 0.05                          | 2.61 ± 0.08                           | 1.05                             |
|                                        | 695     | 11.60          | 35.94        | 2.51 ± 0.05                          | 2.58 ± 0.08                           | 1.03                             |
| 791                                    | 11.72   | 36.07          | 2.52 ± 0.05  | 2.90 ± 0.09                          | 1.15                                  |                                  |
| 989                                    | 11.34   | 36.15          | 2.53 ± 0.05  | 2.68 ± 0.08                          | 1.06                                  |                                  |
| #13<br>41.4°N / -13.9 °E<br>25/05/2014 | 20      | 15.49          | 35.85        | 2.50 ± 0.05                          | 1.75 ± 0.05                           | 0.70                             |
|                                        | 40      | 14.86          | 35.81        | 2.50 ± 0.05                          | 1.83 ± 0.05                           | 0.73                             |
|                                        | 60      | 13.30          | 35.76        | 2.50 ± 0.05                          | 2.23 ± 0.07                           | 0.90                             |
|                                        | 78      | 13.14          | 35.76        | 2.50 ± 0.05                          | 2.31 ± 0.06                           | 0.93                             |
|                                        | 99      | 12.99          | 35.75        | 2.49 ± 0.05                          | 2.26 ± 0.07                           | 0.91                             |
|                                        | 119     | 12.93          | 35.75        | 2.49 ± 0.05                          | 2.63 ± 0.08                           | 1.05                             |
|                                        | 139     | 12.88          | 35.75        | 2.49 ± 0.05                          | 2.82 ± 0.07                           | 1.13                             |
|                                        | 159     | 12.83          | 35.74        | 2.49 ± 0.05                          | 2.64 ± 0.07                           | 1.06                             |
|                                        | 197     | 12.64          | 35.71        | 2.49 ± 0.05                          | 2.52 ± 0.07                           | 1.01                             |
|                                        | 248     | 12.38          | 35.68        | 2.49 ± 0.05                          | 2.65 ± 0.07                           | 1.06                             |
|                                        | 298     | 12.20          | 35.66        | 2.49 ± 0.05                          | 2.50 ± 0.07                           | 1.00                             |
|                                        | 398     | 11.82          | 35.62        | 2.48 ± 0.05                          | 2.52 ± 0.07                           | 1.01                             |
|                                        | 496     | 11.59          | 35.62        | 2.48 ± 0.05                          | 2.66 ± 0.08                           | 1.07                             |
|                                        | 594     | 11.23          | 35.61        | 2.48 ± 0.05                          | 2.61 ± 0.07                           | 1.05                             |
|                                        | 693     | 10.66          | 35.57        | 2.48 ± 0.05                          | 2.55 ± 0.08                           | 1.03                             |
| 792                                    | 10.55   | 35.68          | 2.49 ± 0.05  | 2.35 ± 0.06                          | 0.95                                  |                                  |
| 990                                    | 9.33    | 35.65          | 2.49 ± 0.05  | 2.63 ± 0.08                          | 1.06                                  |                                  |
| 1485                                   | 6.73    | 35.45          | 2.47 ± 0.05  | 2.48 ± 0.07                          | 1.00                                  |                                  |

| Station #                             | Depth m | Temperature °C | Salinity psu | <sup>238</sup> U dpm.L <sup>-1</sup> |        | <sup>234</sup> Th dpm.L <sup>-1</sup> |        | <sup>234</sup> Th/ <sup>238</sup> U |
|---------------------------------------|---------|----------------|--------------|--------------------------------------|--------|---------------------------------------|--------|-------------------------------------|
| #21<br>46.5°N / -19.7°E<br>31/05/2014 | 10      | 14.44          | 35.68        | 2.49                                 | ± 0.05 | 1.41                                  | ± 0.05 | 0.57                                |
|                                       | 20      | 13.65          | 35.66        | 2.49                                 | ± 0.05 | 1.69                                  | ± 0.05 | 0.68                                |
|                                       | 39      | 12.79          | 35.64        | 2.49                                 | ± 0.05 | 1.79                                  | ± 0.05 | 0.72                                |
|                                       | 59      | 12.71          | 35.65        | 2.49                                 | ± 0.05 | 1.80                                  | ± 0.05 | 0.72                                |
|                                       | 76      | 12.63          | 35.67        | 2.49                                 | ± 0.05 | 2.07                                  | ± 0.06 | 0.83                                |
|                                       | 100     | 12.45          | 35.69        | 2.49                                 | ± 0.05 | 2.36                                  | ± 0.07 | 0.95                                |
|                                       | 119     | 12.36          | 35.68        | 2.49                                 | ± 0.05 | 2.62                                  | ± 0.07 | 1.05                                |
|                                       | 158     | 12.23          | 35.66        | 2.49                                 | ± 0.05 | 2.53                                  | ± 0.07 | 1.02                                |
|                                       | 198     | 12.08          | 35.64        | 2.49                                 | ± 0.05 | 2.70                                  | ± 0.07 | 1.09                                |
|                                       | 296     | 11.80          | 35.60        | 2.48                                 | ± 0.05 | 2.83                                  | ± 0.07 | 1.14                                |
|                                       | 396     | 11.38          | 35.55        | 2.48                                 | ± 0.05 | 2.61                                  | ± 0.07 | 1.05                                |
|                                       | 495     | 11.01          | 35.50        | 2.48                                 | ± 0.05 | 2.65                                  | ± 0.08 | 1.07                                |
|                                       | 594     | 10.74          | 35.47        | 2.47                                 | ± 0.05 | 2.52                                  | ± 0.07 | 1.02                                |
|                                       | 693     | 9.78           | 35.32        | 2.46                                 | ± 0.05 | 2.56                                  | ± 0.07 | 1.04                                |
| 792                                   | 8.77    | 35.29          | 2.46         | ± 0.05                               | 2.69   | ± 0.08                                | 1.09   |                                     |
| 989                                   | 7.47    | 35.32          | 2.46         | ± 0.05                               | 2.58   | ± 0.07                                | 1.05   |                                     |
| 1189                                  | 6.17    | 35.21          | 2.45         | ± 0.05                               | 2.36   | ± 0.07                                | 0.96   |                                     |
| #26<br>50.3°N / -22.6°E<br>04/06/2014 | 20      | 11.69          | 35.34        | 2.46                                 | ± 0.05 | 1.90                                  | ± 0.06 | 0.77                                |
|                                       | 49      | 9.77           | 35.19        | 2.45                                 | ± 0.05 | 1.90                                  | ± 0.06 | 0.77                                |
|                                       | 74      | 9.65           | 35.19        | 2.45                                 | ± 0.05 | 1.96                                  | ± 0.06 | 0.80                                |
|                                       | 99      | 9.40           | 35.16        | 2.45                                 | ± 0.05 | 2.07                                  | ± 0.07 | 0.85                                |
|                                       | 199     | 8.88           | 35.17        | 2.45                                 | ± 0.05 | 2.46                                  | ± 0.08 | 1.00                                |
|                                       | 297     | 8.17           | 35.07        | 2.44                                 | ± 0.05 | 2.36                                  | ± 0.07 | 0.97                                |
|                                       | 397     | 7.18           | 34.95        | 2.43                                 | ± 0.05 | 2.47                                  | ± 0.08 | 1.01                                |
|                                       | 593     | 5.97           | 35.00        | 2.44                                 | ± 0.05 | 2.59                                  | ± 0.08 | 1.07                                |
| 792                                   | 5.23    | 35.03          | 2.44         | ± 0.05                               | 2.60   | ± 0.08                                | 1.07   |                                     |
| #32<br>55.5°N / -26.7°E<br>08/06/2014 | 11      | 10.51          | 35.13        | 2.45                                 | ± 0.05 | 1.63                                  | ± 0.08 | 0.67                                |
|                                       | 20      | 10.48          | 35.13        | 2.45                                 | ± 0.05 | 1.58                                  | ± 0.06 | 0.65                                |
|                                       | 40      | 8.89           | 35.07        | 2.44                                 | ± 0.05 | 1.88                                  | ± 0.06 | 0.77                                |
|                                       | 60      | 8.60           | 35.08        | 2.44                                 | ± 0.05 | 1.87                                  | ± 0.05 | 0.77                                |
|                                       | 99      | 8.67           | 35.13        | 2.45                                 | ± 0.05 | 1.64                                  | ± 0.05 | 0.67                                |
|                                       | 119     | 8.08           | 35.04        | 2.44                                 | ± 0.05 | 2.32                                  | ± 0.06 | 0.95                                |
|                                       | 139     | 7.88           | 35.03        | 2.44                                 | ± 0.05 | 2.59                                  | ± 0.08 | 1.06                                |
|                                       | 160     | 8.23           | 35.12        | 2.45                                 | ± 0.05 | 2.48                                  | ± 0.07 | 1.01                                |
|                                       | 199     | 7.99           | 35.09        | 2.44                                 | ± 0.05 | 2.42                                  | ± 0.07 | 0.99                                |
|                                       | 298     | 7.05           | 34.98        | 2.43                                 | ± 0.05 | 2.48                                  | ± 0.07 | 1.02                                |
|                                       | 376     | 5.99           | 34.89        | 2.43                                 | ± 0.05 | 2.52                                  | ± 0.07 | 1.04                                |
|                                       | 446     | 6.36           | 35.04        | 2.44                                 | ± 0.05 | 2.47                                  | ± 0.07 | 1.01                                |
|                                       | 494     | 5.70           | 34.98        | 2.43                                 | ± 0.05 | 2.50                                  | ± 0.07 | 1.03                                |
|                                       | 593     | 5.15           | 34.98        | 2.43                                 | ± 0.05 | 2.52                                  | ± 0.08 | 1.04                                |
| 693                                   | 4.78    | 34.96          | 2.43         | ± 0.05                               | 2.45   | ± 0.07                                | 1.01   |                                     |
| 792                                   | 4.48    | 34.94          | 2.43         | ± 0.05                               | 2.29   | ± 0.06                                | 0.94   |                                     |

| Station #                             | Depth m | Temperature °C | Salinity psu | <sup>238</sup> U dpm.L <sup>-1</sup> |        | <sup>234</sup> Th dpm.L <sup>-1</sup> |        | <sup>234</sup> Th/ <sup>238</sup> U |
|---------------------------------------|---------|----------------|--------------|--------------------------------------|--------|---------------------------------------|--------|-------------------------------------|
| #38<br>58.8°N / -31.3°E<br>11/06/2014 | 10      | 9.30           | 35.06        | 2.44                                 | ± 0.05 | 1.23                                  | ± 0.04 | 0.50                                |
|                                       | 19      | 9.18           | 35.06        | 2.44                                 | ± 0.05 | 1.48                                  | ± 0.05 | 0.61                                |
|                                       | 39      | 8.22           | 35.08        | 2.44                                 | ± 0.05 | 2.12                                  | ± 0.07 | 0.87                                |
|                                       | 60      | 8.00           | 35.11        | 2.44                                 | ± 0.05 | 2.38                                  | ± 0.07 | 0.97                                |
|                                       | 78      | 7.73           | 35.11        | 2.44                                 | ± 0.05 | 2.45                                  | ± 0.07 | 1.00                                |
|                                       | 99      | 7.73           | 35.13        | 2.45                                 | ± 0.05 | 2.61                                  | ± 0.08 | 1.07                                |
|                                       | 118     | 7.68           | 35.14        | 2.45                                 | ± 0.05 | 2.61                                  | ± 0.08 | 1.07                                |
|                                       | 138     | 7.67           | 35.14        | 2.45                                 | ± 0.05 | 2.41                                  | ± 0.07 | 0.99                                |
|                                       | 158     | 7.62           | 35.14        | 2.45                                 | ± 0.05 | 2.43                                  | ± 0.07 | 0.99                                |
|                                       | 178     | 7.59           | 35.14        | 2.45                                 | ± 0.05 | 2.51                                  | ± 0.07 | 1.02                                |
|                                       | 198     | 7.60           | 35.15        | 2.45                                 | ± 0.05 | 2.46                                  | ± 0.07 | 1.01                                |
|                                       | 298     | 7.41           | 35.14        | 2.45                                 | ± 0.05 | 2.40                                  | ± 0.08 | 0.98                                |
|                                       | 396     | 7.21           | 35.13        | 2.45                                 | ± 0.05 | 2.50                                  | ± 0.09 | 1.02                                |
|                                       | 494     | 6.86           | 35.11        | 2.44                                 | ± 0.05 | 2.45                                  | ± 0.09 | 1.00                                |
|                                       | 593     | 6.32           | 35.09        | 2.44                                 | ± 0.05 | 2.48                                  | ± 0.08 | 1.01                                |
| 693                                   | 5.68    | 35.05          | 2.44         | ± 0.05                               | 2.54   | ± 0.09                                | 1.04   |                                     |
| 791                                   | 5.00    | 35.01          | 2.44         | ± 0.05                               | 2.51   | ± 0.09                                | 1.03   |                                     |
| #44<br>59.6°N / -38.9°E<br>14/06/2014 | 9       | 6.83           | 34.85        | 2.42                                 | ± 0.05 | 1.91                                  | ± 0.06 | 0.79                                |
|                                       | 20      | 6.80           | 34.85        | 2.42                                 | ± 0.05 | 2.18                                  | ± 0.06 | 0.90                                |
|                                       | 40      | 5.07           | 34.89        | 2.43                                 | ± 0.05 | 2.42                                  | ± 0.07 | 1.00                                |
|                                       | 59      | 4.49           | 34.87        | 2.43                                 | ± 0.05 | 2.46                                  | ± 0.07 | 1.01                                |
|                                       | 79      | 4.33           | 34.90        | 2.43                                 | ± 0.05 | 2.31                                  | ± 0.06 | 0.95                                |
|                                       | 99      | 4.28           | 34.91        | 2.43                                 | ± 0.05 | 2.40                                  | ± 0.06 | 0.99                                |
|                                       | 118     | 4.12           | 34.89        | 2.43                                 | ± 0.05 | 2.44                                  | ± 0.07 | 1.00                                |
|                                       | 138     | 4.03           | 34.89        | 2.43                                 | ± 0.05 | 2.23                                  | ± 0.05 | 0.92                                |
|                                       | 158     | 4.04           | 34.89        | 2.43                                 | ± 0.05 | 2.42                                  | ± 0.07 | 1.00                                |
|                                       | 198     | 4.00           | 34.89        | 2.43                                 | ± 0.05 | 2.35                                  | ± 0.06 | 0.97                                |
|                                       | 297     | 3.92           | 34.89        | 2.43                                 | ± 0.05 | 2.56                                  | ± 0.06 | 1.05                                |
|                                       | 396     | 3.88           | 34.89        | 2.43                                 | ± 0.05 | 2.56                                  | ± 0.07 | 1.05                                |
|                                       | 495     | 3.79           | 34.88        | 2.43                                 | ± 0.05 | 2.38                                  | ± 0.06 | 0.98                                |
|                                       | 594     | 3.73           | 34.88        | 2.43                                 | ± 0.05 | 2.35                                  | ± 0.05 | 0.97                                |
|                                       | 692     | 3.63           | 34.87        | 2.43                                 | ± 0.05 | 2.62                                  | ± 0.06 | 1.08                                |
| 792                                   | 3.61    | 34.87          | 2.43         | ± 0.05                               | 2.23   | ± 0.06                                | 0.92   |                                     |
| 1087                                  | 3.70    | 34.89          | 2.43         | ± 0.05                               | 2.43   | ± 0.07                                | 1.00   |                                     |

| Station #                             | Depth m | Temperature °C | Salinity psu | <sup>238</sup> U<br>dpm.L <sup>-1</sup> |        | <sup>234</sup> Th<br>dpm.L <sup>-1</sup> |        | <sup>234</sup> Th/ <sup>238</sup> U |
|---------------------------------------|---------|----------------|--------------|-----------------------------------------|--------|------------------------------------------|--------|-------------------------------------|
| #51<br>59.8°N / -42.0°E<br>18/06/2014 | 11      | 6.76           | 34.87        | 2.43                                    | ± 0.05 | 1.92                                     | ± 0.06 | 0.79                                |
|                                       | 19      | 6.65           | 34.88        | 2.43                                    | ± 0.05 | 1.89                                     | ± 0.05 | 0.78                                |
|                                       | 40      | 6.18           | 34.95        | 2.43                                    | ± 0.05 | 2.18                                     | ± 0.07 | 0.90                                |
|                                       | 60      | 5.96           | 34.97        | 2.43                                    | ± 0.05 | 2.07                                     | ± 0.06 | 0.85                                |
|                                       | 79      | 5.58           | 34.95        | 2.43                                    | ± 0.05 | 2.20                                     | ± 0.06 | 0.91                                |
|                                       | 100     | 5.51           | 34.95        | 2.43                                    | ± 0.05 | 2.44                                     | ± 0.07 | 1.00                                |
|                                       | 119     | 5.27           | 34.93        | 2.43                                    | ± 0.05 | 2.58                                     | ± 0.07 | 1.06                                |
|                                       | 139     | 5.13           | 34.92        | 2.43                                    | ± 0.05 | 2.42                                     | ± 0.07 | 1.00                                |
|                                       | 159     | 5.16           | 34.94        | 2.43                                    | ± 0.05 | 2.31                                     | ± 0.06 | 0.95                                |
|                                       | 178     | 4.93           | 34.92        | 2.43                                    | ± 0.05 | 2.44                                     | ± 0.07 | 1.01                                |
|                                       | 199     | 4.99           | 34.94        | 2.43                                    | ± 0.05 | 2.53                                     | ± 0.07 | 1.04                                |
|                                       | 298     | 4.97           | 34.96        | 2.43                                    | ± 0.05 | 2.51                                     | ± 0.07 | 1.03                                |
|                                       | 396     | 4.66           | 34.95        | 2.43                                    | ± 0.05 | 2.41                                     | ± 0.07 | 0.99                                |
|                                       | 495     | 4.51           | 34.94        | 2.43                                    | ± 0.05 | 2.26                                     | ± 0.06 | 0.93                                |
| 593                                   | 4.17    | 34.92          | 2.43         | ± 0.05                                  | 2.30   | ± 0.06                                   | 0.94   |                                     |
| 692                                   | 4.05    | 34.91          | 2.43         | ± 0.05                                  | 2.49   | ± 0.07                                   | 1.02   |                                     |
| 791                                   | 4.01    | 34.92          | 2.43         | ± 0.05                                  | 2.46   | ± 0.07                                   | 1.01   |                                     |
| #53<br>59.9°N / -43.1°E<br>16/06/2014 | 10      | -0.73          | 31.91        | 2.19                                    | ± 0.05 | 1.75                                     | ± 0.06 | 0.80                                |
|                                       | 20      | -1.21          | 32.14        | 2.21                                    | ± 0.05 | 2.08                                     | ± 0.10 | 0.94                                |
|                                       | 40      | -1.24          | 32.80        | 2.26                                    | ± 0.05 | 2.02                                     | ± 0.06 | 0.89                                |
|                                       | 59      | -1.47          | 33.05        | 2.28                                    | ± 0.05 | 2.20                                     | ± 0.07 | 0.96                                |
|                                       | 79      | -1.31          | 33.16        | 2.29                                    | ± 0.05 | 2.21                                     | ± 0.07 | 0.96                                |
|                                       | 99      | -0.79          | 33.36        | 2.31                                    | ± 0.05 | 2.08                                     | ± 0.07 | 0.90                                |
|                                       | 119     | 0.84           | 33.56        | 2.32                                    | ± 0.05 | 2.03                                     | ± 0.06 | 0.87                                |
| 138                                   | -0.08   | 33.59          | 2.33         | ± 0.05                                  | 1.91   | ± 0.06                                   | 0.82   |                                     |
| #64<br>59.1°N / -46.1°E<br>20/06/2014 | 9       | 6.55           | 34.80        | 2.42                                    | ± 0.05 | 1.89                                     | ± 0.10 | 0.78                                |
|                                       | 20      | 6.04           | 34.85        | 2.42                                    | ± 0.05 | 2.00                                     | ± 0.07 | 0.83                                |
|                                       | 40      | 5.93           | 34.87        | 2.43                                    | ± 0.05 | 1.88                                     | ± 0.07 | 0.78                                |
|                                       | 79      | 5.37           | 34.95        | 2.43                                    | ± 0.05 | 2.46                                     | ± 0.09 | 1.01                                |
|                                       | 99      | 5.35           | 34.96        | 2.43                                    | ± 0.05 | 2.57                                     | ± 0.09 | 1.06                                |
|                                       | 139     | 5.17           | 34.96        | 2.43                                    | ± 0.05 | 2.43                                     | ± 0.09 | 1.00                                |
|                                       | 159     | 4.92           | 34.94        | 2.43                                    | ± 0.05 | 2.43                                     | ± 0.09 | 1.00                                |
|                                       | 197     | 4.78           | 34.93        | 2.43                                    | ± 0.05 | 2.31                                     | ± 0.08 | 0.95                                |
|                                       | 297     | 4.51           | 34.93        | 2.43                                    | ± 0.05 | 2.33                                     | ± 0.09 | 0.96                                |
|                                       | 396     | 4.35           | 34.93        | 2.43                                    | ± 0.05 | 2.45                                     | ± 0.09 | 1.01                                |
|                                       | 494     | 4.10           | 34.91        | 2.43                                    | ± 0.05 | 2.54                                     | ± 0.09 | 1.04                                |
|                                       | 594     | 3.97           | 34.90        | 2.43                                    | ± 0.05 | 2.52                                     | ± 0.09 | 1.04                                |
| 692                                   | 3.88    | 34.89          | 2.43         | ± 0.05                                  | 2.42   | ± 0.09                                   | 1.00   |                                     |
| 792                                   | 3.71    | 34.88          | 2.43         | ± 0.05                                  | 2.46   | ± 0.09                                   | 1.01   |                                     |
| 890                                   | 3.64    | 34.87          | 2.43         | ± 0.05                                  | 2.46   | ± 0.09                                   | 1.02   |                                     |

| Station #                             | Depth m | Temperature °C | Salinity psu | <sup>238</sup> U dpm.L <sup>-1</sup> |        | <sup>234</sup> Th dpm.L <sup>-1</sup> |        | <sup>234</sup> Th/ <sup>238</sup> U |
|---------------------------------------|---------|----------------|--------------|--------------------------------------|--------|---------------------------------------|--------|-------------------------------------|
| #69<br>55.8°N / -48.1°E<br>23/06/2014 | 11      | 6.23           | 34.61        | 2.41                                 | ± 0.05 | 1.58                                  | ± 0.05 | 0.66                                |
|                                       | 20      | 6.15           | 34.61        | 2.41                                 | ± 0.05 | 1.84                                  | ± 0.05 | 0.77                                |
|                                       | 59      | 3.73           | 34.77        | 2.42                                 | ± 0.05 | 2.58                                  | ± 0.09 | 1.07                                |
|                                       | 80      | 3.92           | 34.83        | 2.42                                 | ± 0.05 | 2.52                                  | ± 0.08 | 1.04                                |
|                                       | 99      | 3.83           | 34.82        | 2.42                                 | ± 0.05 | 2.62                                  | ± 0.08 | 1.08                                |
|                                       | 119     | 3.95           | 34.85        | 2.42                                 | ± 0.05 | 2.55                                  | ± 0.08 | 1.05                                |
|                                       | 139     | 3.91           | 34.86        | 2.42                                 | ± 0.05 | 2.45                                  | ± 0.08 | 1.01                                |
|                                       | 159     | 3.83           | 34.86        | 2.42                                 | ± 0.05 | 2.41                                  | ± 0.07 | 0.99                                |
|                                       | 199     | 3.58           | 34.84        | 2.42                                 | ± 0.05 | 2.61                                  | ± 0.08 | 1.08                                |
|                                       | 298     | 3.54           | 34.85        | 2.42                                 | ± 0.05 | 2.56                                  | ± 0.08 | 1.05                                |
|                                       | 496     | 3.51           | 34.85        | 2.42                                 | ± 0.05 | 2.33                                  | ± 0.07 | 0.96                                |
|                                       | 595     | 3.48           | 34.85        | 2.42                                 | ± 0.05 | 2.50                                  | ± 0.08 | 1.03                                |
|                                       | 693     | 3.47           | 34.85        | 2.42                                 | ± 0.05 | 2.37                                  | ± 0.07 | 0.98                                |
|                                       | 792     | 3.48           | 34.85        | 2.42                                 | ± 0.05 | 2.53                                  | ± 0.08 | 1.04                                |
| 890                                   | 3.48    | 34.85          | 2.42         | ± 0.05                               | 2.32   | ± 0.08                                | 0.96   |                                     |
| 990                                   | 3.46    | 34.85          | 2.42         | ± 0.05                               | 2.36   | ± 0.07                                | 0.98   |                                     |
| #77<br>53.0°N / -51.1°E<br>26/06/2014 | 10      | 6.92           | 34.49        | 2.40                                 | ± 0.05 | 1.80                                  | ± 0.07 | 0.75                                |
|                                       | 20      | 6.27           | 34.56        | 2.40                                 | ± 0.05 | 1.76                                  | ± 0.07 | 0.73                                |
|                                       | 39      | 5.11           | 34.64        | 2.41                                 | ± 0.05 | 2.12                                  | ± 0.08 | 0.88                                |
|                                       | 59      | 4.09           | 34.71        | 2.41                                 | ± 0.05 | 2.39                                  | ± 0.10 | 0.99                                |
|                                       | 79      | 3.60           | 34.74        | 2.42                                 | ± 0.05 | 2.27                                  | ± 0.07 | 0.94                                |
|                                       | 100     | 3.49           | 34.76        | 2.42                                 | ± 0.05 | 2.64                                  | ± 0.08 | 1.09                                |
|                                       | 119     | 3.44           | 34.77        | 2.42                                 | ± 0.05 | 2.52                                  | ± 0.08 | 1.04                                |
|                                       | 139     | 3.41           | 34.79        | 2.42                                 | ± 0.05 | 2.57                                  | ± 0.08 | 1.06                                |
|                                       | 159     | 3.43           | 34.81        | 2.42                                 | ± 0.05 | 2.64                                  | ± 0.08 | 1.09                                |
|                                       | 199     | 3.46           | 34.83        | 2.42                                 | ± 0.05 | 2.36                                  | ± 0.08 | 0.97                                |
|                                       | 298     | 3.53           | 34.85        | 2.42                                 | ± 0.05 | 2.57                                  | ± 0.09 | 1.06                                |
|                                       | 397     | 3.57           | 34.86        | 2.42                                 | ± 0.05 | 2.67                                  | ± 0.09 | 1.10                                |
|                                       | 495     | 3.52           | 34.86        | 2.42                                 | ± 0.05 | 2.60                                  | ± 0.09 | 1.07                                |
|                                       | 595     | 3.56           | 34.87        | 2.43                                 | ± 0.05 | 2.49                                  | ± 0.08 | 1.03                                |
| 693                                   | 3.49    | 34.86          | 2.43         | ± 0.05                               | 2.69   | ± 0.08                                | 1.11   |                                     |

**Table S2:** Particulate  $^{234}\text{Th}$  activities and POC concentrations in the small (SSF; 1-53  $\mu\text{m}$ ) and large size fraction (LSF;  $>53 \mu\text{m}$ ).

| Station                   | Depth | 1-53 $\mu\text{m}$ (SSF) |         |                        |         | $>53 \mu\text{m}$ (LSF) |         |                        |         |
|---------------------------|-------|--------------------------|---------|------------------------|---------|-------------------------|---------|------------------------|---------|
|                           |       | $^{234}\text{Th}$        |         | POC                    |         | $^{234}\text{Th}$       |         | POC                    |         |
| #                         | m     | dpm L <sup>-1</sup>      |         | $\mu\text{mol L}^{-1}$ |         | dpm L <sup>-1</sup>     |         | $\mu\text{mol L}^{-1}$ |         |
| #1<br>40.3°N<br>-10.0 °E  | 30    | 0.163                    | ± 0.005 | 2.639                  | ± 0.099 | 0.021                   | ± 0.001 | 0.651                  | ± 0.009 |
|                           | 80    | 0.086                    | ± 0.003 | 0.208                  | ± 0.017 | 0.022                   | ± 0.001 | 0.357                  | ± 0.005 |
|                           | 120   | 0.188                    | ± 0.006 | 0.567                  | ± 0.035 | 0.021                   | ± 0.001 | 0.105                  | ± 0.005 |
|                           | 250   | 0.171                    | ± 0.004 | 0.428                  | ± 0.019 | 0.038                   | ± 0.001 | 0.068                  | ± 0.006 |
|                           | 550   | 0.123                    | ± 0.004 | 0.217                  | ± 0.016 | 0.014                   | ± 0.000 | 0.023                  | ± 0.002 |
|                           | 800   | 0.068                    | ± 0.003 | 0.035                  | ± 0.032 | 0.011                   | ± 0.001 | 0.024                  | ± 0.005 |
| #13<br>41.4°N<br>-13.9 °E | 30    | 0.456                    | ± 0.004 | 2.160                  | ± 0.035 | 0.028                   | ± 0.001 | 0.196                  | ± 0.005 |
|                           | 80    | 0.529                    | ± 0.004 | 1.170                  | ± 0.027 | 0.030                   | ± 0.001 | 0.080                  | ± 0.004 |
|                           | 120   | 0.431                    | ± 0.004 |                        | ±       | 0.032                   | ± 0.001 | 0.039                  | ± 0.005 |
|                           | 250   | 0.210                    | ± 0.002 | 0.366                  | ± 0.021 | 0.020                   | ± 0.001 | 0.027                  | ± 0.003 |
|                           | 450   | 0.133                    | ± 0.001 | 0.266                  | ± 0.016 | 0.009                   | ± 0.000 | 0.018                  | ± 0.002 |
| #21<br>46.5°N<br>-19.7°E  | 15    | 0.280                    | ± 0.009 | 6.053                  | ± 0.068 | 0.161                   | ± 0.003 | 4.747                  | ± 0.020 |
|                           | 60    | 0.775                    | ± 0.017 | 4.064                  | ± 0.105 | 0.243                   | ± 0.005 | 1.201                  | ± 0.031 |
|                           | 100   | 0.225                    | ± 0.005 | 0.545                  | ± 0.023 | 0.052                   | ± 0.001 | 0.133                  | ± 0.007 |
|                           | 200   | 0.122                    | ± 0.003 | 0.360                  | ± 0.021 | 0.038                   | ± 0.001 | 0.046                  | ± 0.002 |
|                           | 450   | 0.114                    | ± 0.003 | 0.234                  | ± 0.016 | 0.022                   | ± 0.000 | 0.023                  | ± 0.002 |
|                           | 800   | 0.108                    | ± 0.002 | 0.158                  | ± 0.013 | 0.014                   | ± 0.000 | 0.017                  | ± 0.001 |
| #26<br>50.3°N<br>-22.6°E  | 30    | 0.279                    | ± 0.008 | 4.792                  | ± 0.059 | 0.206                   | ± 0.004 | 2.572                  | ± 0.017 |
|                           | 83    | 0.225                    | ± 0.005 | 0.848                  | ± 0.022 | 0.201                   | ± 0.002 | 0.877                  | ± 0.007 |
|                           | 153   | 0.131                    | ± 0.003 | 0.400                  | ± 0.021 | 0.030                   | ± 0.001 | 0.123                  | ± 0.003 |
|                           | 400   | 0.111                    | ± 0.005 | 0.240                  | ± 0.049 | 0.012                   | ± 0.001 | 0.035                  | ± 0.007 |
| #32<br>55.5°N<br>-26.7°E  | 30    | 0.109                    | ± 0.003 | 5.830                  | ± 0.097 | 0.045                   | ± 0.002 | 0.292                  | ± 0.014 |
|                           | 60    | 0.359                    | ± 0.007 | 1.565                  | ± 0.027 | 0.027                   | ± 0.001 | 0.124                  | ± 0.004 |
|                           | 100   | 0.224                    | ± 0.005 | 0.887                  | ± 0.024 | 0.080                   | ± 0.002 | 0.338                  | ± 0.007 |
|                           | 200   | 0.121                    | ± 0.004 | 0.467                  | ± 0.022 | 0.010                   | ± 0.000 | 0.046                  | ± 0.003 |
|                           | 450   | 0.078                    | ± 0.002 | 0.240                  | ± 0.017 | 0.012                   | ± 0.000 | 0.037                  | ± 0.002 |
|                           | 800   | 0.084                    | ± 0.002 | 0.203                  | ± 0.015 | 0.010                   | ± 0.000 | 0.066                  | ± 0.002 |
| #38<br>58.8°N<br>-31.3°E  | 20    | 0.239                    | ± 0.006 | 2.231                  | ± 0.041 | 0.028                   | ± 0.001 | 0.156                  | ± 0.004 |
|                           | 60    | 0.290                    | ± 0.006 | 1.273                  | ± 0.028 | 0.037                   | ± 0.001 | 0.128                  | ± 0.004 |
|                           | 109   | 0.143                    | ± 0.003 | 0.621                  | ± 0.018 | 0.043                   | ± 0.001 | 0.156                  | ± 0.005 |
|                           | 396   | 0.133                    | ± 0.004 | 0.292                  | ± 0.036 | 0.009                   | ± 0.000 | 0.030                  | ± 0.005 |
| #44<br>59.6°N<br>-38.9°E  | 20    | 1.188                    | ± 0.020 | 16.736                 | ± 0.102 | 0.480                   | ± 0.007 | 3.965                  | ± 0.020 |
|                           | 40    | 0.474                    | ± 0.010 | 3.550                  | ± 0.056 | 0.041                   | ± 0.001 | 0.133                  | ± 0.013 |
|                           | 80    | 1.060                    | ± 0.028 | 6.736                  | ± 0.213 | 0.098                   | ± 0.004 | 0.306                  | ± 0.046 |
|                           | 150   | 0.116                    | ± 0.004 | 0.392                  | ± 0.041 | 0.005                   | ± 0.000 | 0.026                  | ± 0.009 |
|                           | 300   | 0.092                    | ± 0.003 | 0.334                  | ± 0.022 | 0.004                   | ± 0.000 | 0.022                  | ± 0.005 |
|                           | 500   | 0.067                    | ± 0.002 | 0.187                  | ± 0.016 | 0.005                   | ± 0.000 | 0.016                  | ± 0.004 |
| #51<br>59.8°N<br>-42.0°E  | 8     | 0.183                    | ± 0.007 | 4.109                  | ± 0.064 | 0.230                   | ± 0.005 | 2.664                  | ± 0.017 |
|                           | 20    | 0.958                    | ± 0.025 | 8.974                  | ± 0.111 |                         |         |                        |         |
|                           | 60    | 0.366                    | ± 0.009 | 2.154                  | ± 0.036 | 0.148                   | ± 0.003 | 0.554                  | ± 0.010 |
|                           | 70    | 0.451                    | ± 0.009 | 2.375                  | ± 0.034 |                         |         |                        |         |
|                           | 100   | 0.179                    | ± 0.006 | 0.832                  | ± 0.032 | 0.052                   | ± 0.002 | 0.153                  | ± 0.007 |
|                           | 150   | 0.193                    | ± 0.006 | 0.747                  | ± 0.039 |                         |         |                        |         |
|                           | 250   | 0.088                    | ± 0.003 | 0.328                  | ± 0.021 | 0.017                   | ± 0.001 | 0.076                  | ± 0.005 |

| Station                         | Depth | 1-53 $\mu\text{m}$ (SSF) |         |                        |         | >53 $\mu\text{m}$ (LSF) |         |                        |         |
|---------------------------------|-------|--------------------------|---------|------------------------|---------|-------------------------|---------|------------------------|---------|
|                                 |       | $^{234}\text{Th}$        |         | POC                    |         | $^{234}\text{Th}$       |         | POC                    |         |
| #                               | m     | dpm L <sup>-1</sup>      |         | $\mu\text{mol L}^{-1}$ |         | dpm L <sup>-1</sup>     |         | $\mu\text{mol L}^{-1}$ |         |
| <b>#64</b><br>59.1°N<br>-46.1°E | 30    | 0.024                    | ± 0.001 | 0.418                  | ± 0.009 | 0.026                   | ± 0.001 | 0.373                  | ± 0.002 |
|                                 | 60    | 0.174                    | ± 0.007 | 1.726                  | ± 0.054 | 0.015                   | ± 0.001 | 0.154                  | ± 0.012 |
|                                 | 100   | 0.162                    | ± 0.004 | 1.968                  | ± 0.028 | 0.030                   | ± 0.001 | 0.267                  | ± 0.006 |
|                                 | 150   | 0.118                    | ± 0.005 | 0.189                  | ± 0.046 | 0.035                   | ± 0.002 | 0.208                  | ± 0.007 |
|                                 | 400   | 0.113                    | ± 0.003 | 0.309                  | ± 0.019 | 0.010                   | ± 0.000 | 0.054                  | ± 0.004 |
| <b>#69</b><br>55.8°N<br>-48.1°E | 30    | 0.206                    | ± 0.007 | 4.130                  | ± 0.052 | 0.070                   | ± 0.002 | 1.077                  | ± 0.013 |
|                                 | 60    | 0.159                    | ± 0.005 | 1.958                  | ± 0.040 | 0.015                   | ± 0.001 | 0.172                  | ± 0.009 |
|                                 | 100   | 0.124                    | ± 0.004 | 1.655                  | ± 0.028 | 0.030                   | ± 0.001 | 0.299                  | ± 0.007 |
|                                 | 150   | 0.097                    | ± 0.004 | 0.895                  | ± 0.039 | 0.010                   | ± 0.001 | 0.083                  | ± 0.009 |
|                                 | 410   | 0.069                    | ± 0.002 | 0.313                  | ± 0.022 | 0.006                   | ± 0.000 | 0.075                  | ± 0.005 |
| <b>#77</b><br>53.0°N<br>-51.1°E | 10    | 0.313                    | ± 0.011 | 11.182                 | ± 0.098 | 0.206                   | ± 0.006 | 3.039                  | ± 0.021 |
|                                 | 50    | 0.447                    | ± 0.012 | 5.488                  | ± 0.067 | 0.057                   | ± 0.002 | 0.425                  | ± 0.016 |
|                                 | 80    | 0.150                    | ± 0.004 | 2.347                  | ± 0.028 | 0.039                   | ± 0.001 | 0.339                  | ± 0.007 |
|                                 | 200   | 0.100                    | ± 0.004 | 0.533                  | ± 0.040 | 0.009                   | ± 0.000 | 0.081                  | ± 0.008 |
|                                 | 460   | 0.069                    | ± 0.003 | 0.167                  | ± 0.017 | 0.011                   | ± 0.000 | 0.060                  | ± 0.004 |

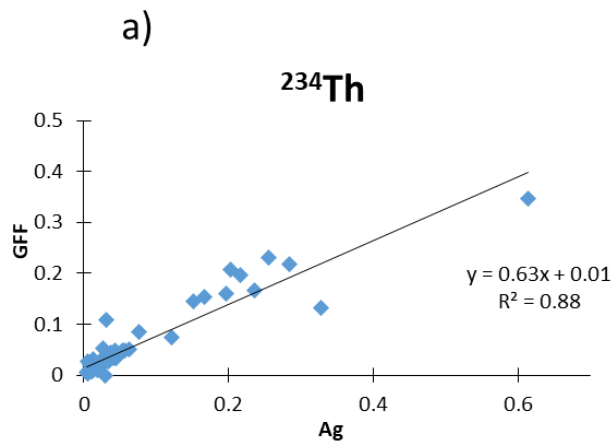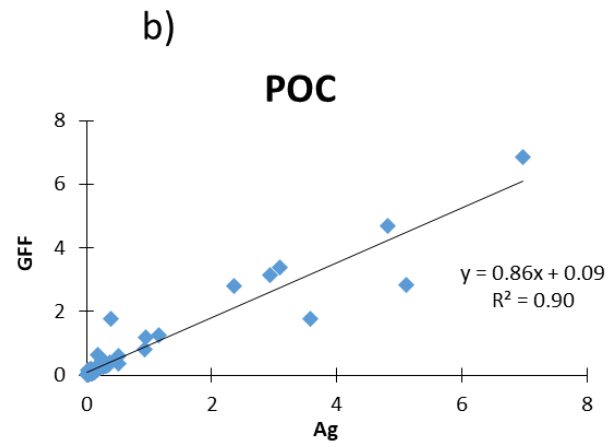

**Figure S1:** Comparison between a)  $^{234}\text{Th}$  activities and b) POC concentrations determined on GF/F and silver (Ag) filters.



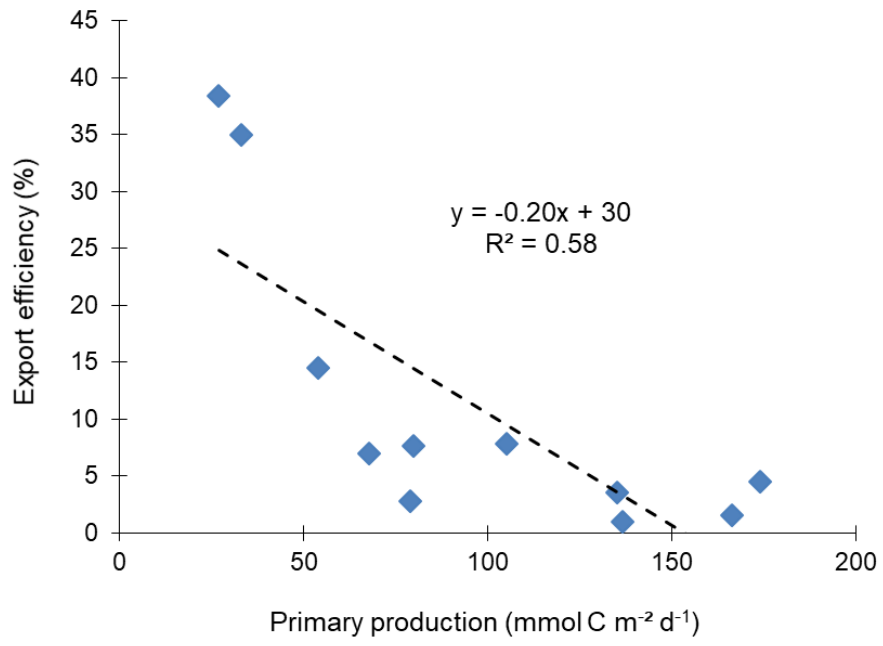

**Figure S2:** Export efficiency (in %) in function of the primary production (mmol C m<sup>-2</sup> d<sup>-1</sup>).
